# Supplementary material for: Construction of Simplified Microbial Consortia to Degrade Recalcitrant Materials Based on Enrichment and Dilution-to-Extinction Cultures
Source: PubMed Central journal article supplement (PMC6968696; doi:10.3389/fmicb.2019.03010), 2020-01-10
Supplement: Data_Sheet_1.pdf [file Data_Sheet_1.pdf]

**Supplemental Material for**

**Construction of simplified microbial consortia to degrade recalcitrant materials based on enrichment and dilution-to-extinction cultures**

Dingrong Kang<sup>1</sup>, Samuel Jacquiod<sup>1,2</sup>, Jakob Herschend<sup>1</sup>, Shaodong Wei<sup>1</sup>, Joseph Nesme<sup>1</sup>, Søren J. Sørensen<sup>1\*</sup>

<sup>1</sup>Section of Microbiology, Department of Biology, University of Copenhagen, Copenhagen, Denmark

<sup>2</sup>Agroécologie, AgroSup Dijon, INRA, Univ. Bourgogne Franche-Comté, France

\*Corresponding author

Supplementary data includes 1 figure.

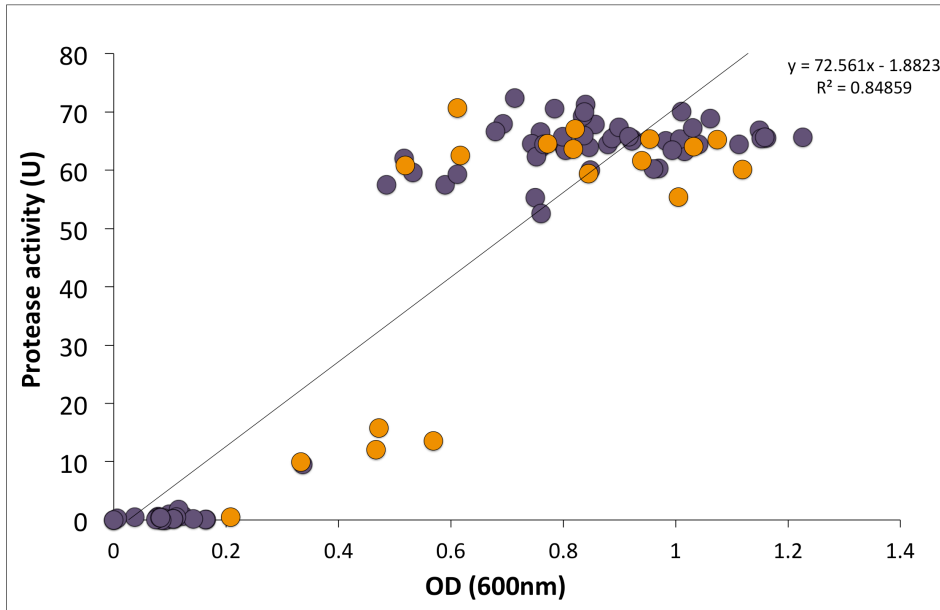

**Fig. S1. The biological characteristics (cell density and protease activity) of 96 simplified microbial consortia (SMC) from dilution  $10^{-9}$ .** Dots represent each of the 96 biological replicates, including the 18 simplified microbial consortia (yellow dots), which were selected for further functional assessment.
